# Supplementary material
Source: MDPI journal article supplement (https://www.mdpi.com/search?q=materials-10-00496)
Supplement: s001 [file materials-10-00496-s001.pdf]

# A Study of Ziegler–Natta Propylene Polymerization Catalysts by Spectroscopic Methods

Olga P. Tkachenko, Alexey V. Kucherov, Leonid M. Kustov, Ville Virkkunen, Timo Leinonen and Peter Denifl

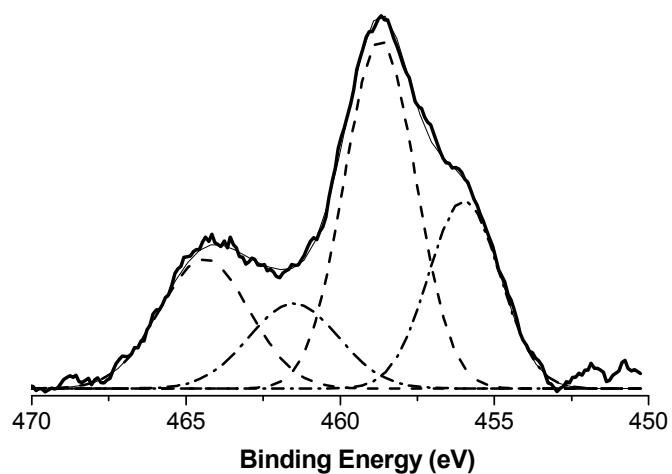

**Figure S1.** Deconvolution of XPS Ti 2p doublet of sample C.

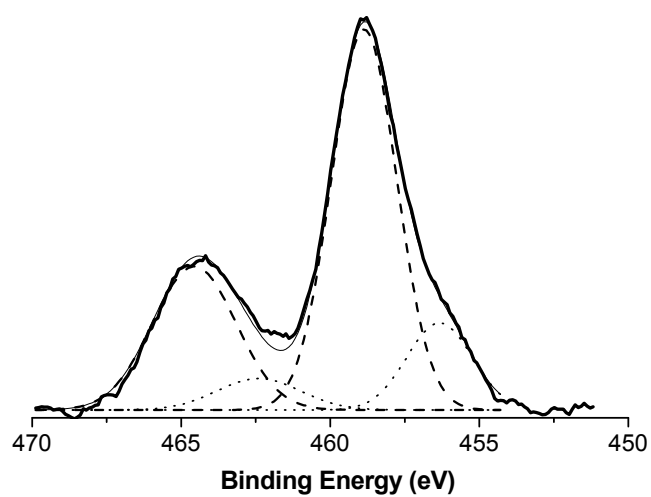

**Figure S2.** Deconvolution of XPS Ti 2p doublet of sample D.

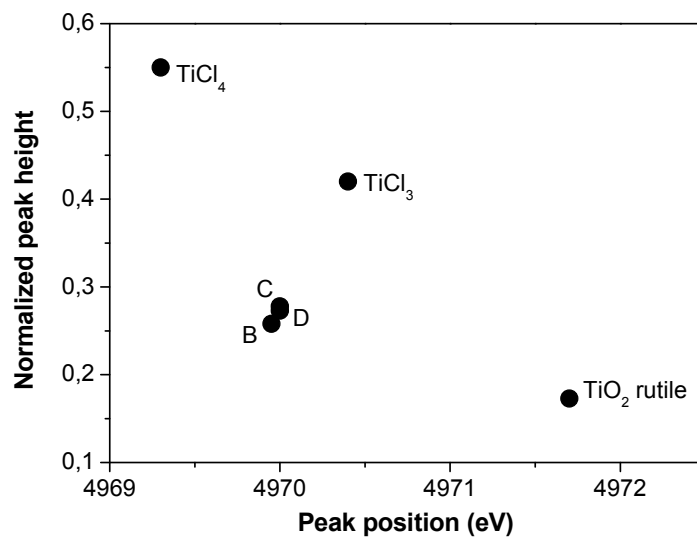

**Figure S3.** Normalized pre-edge height vs. energy position for Ti K-pre-edge features.

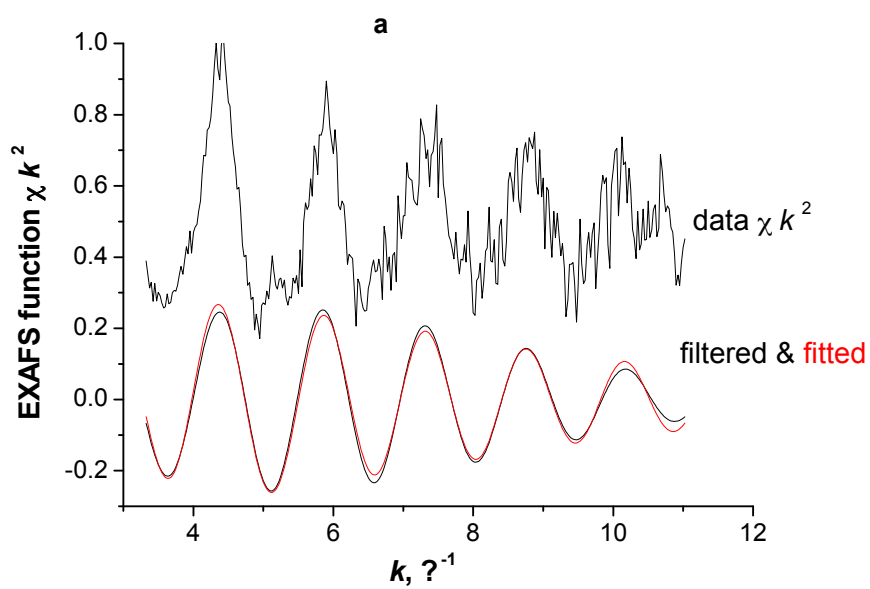

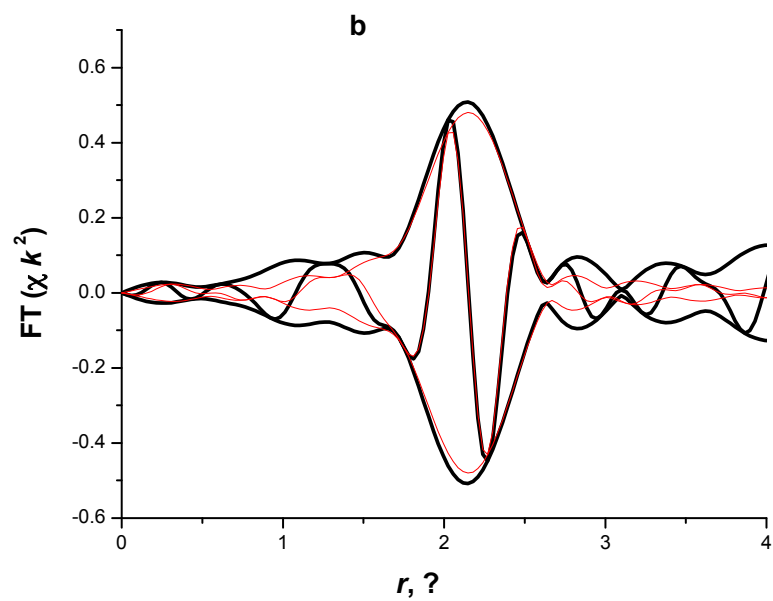

**Figure S4.** Model fits of the Ti *K*-edge EXAFS spectrum of sample B in *k*-space (**a**) and *r*-space (**b**).
